# Supplementary material for: Theoretical study on intra-molecule interactions in TKX-50
Source: Royal Society of Chemistry journal article supplement (doi:10.1039/d3cp03564f), 2023-01-01
Supplement: d3cp03564f1.pdf [file d3cp03564f1.pdf]

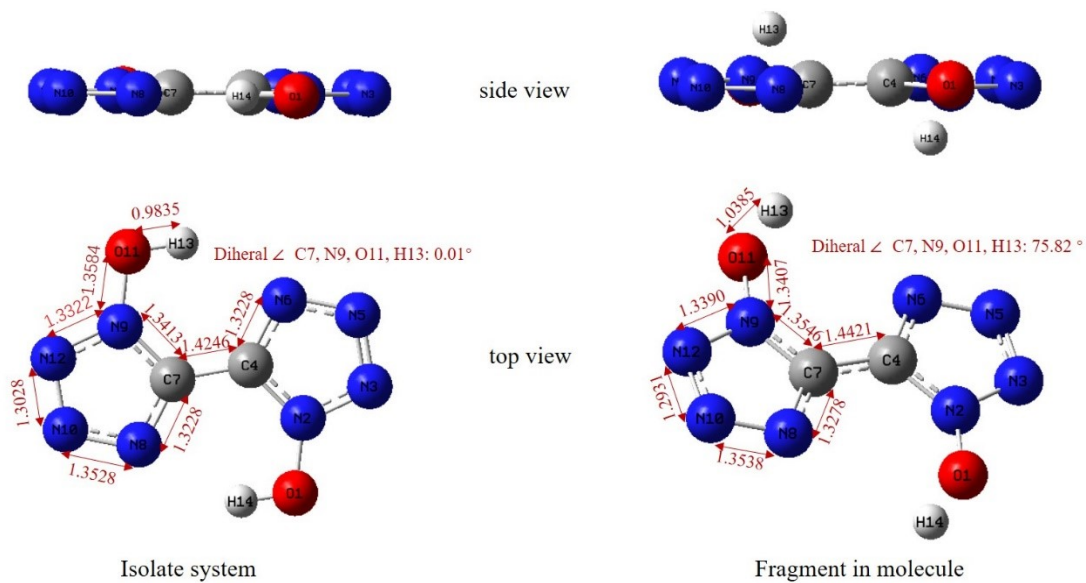

S1: optimized structure comparison of  $\text{HOC}_2\text{N}_8\text{OH}$  and fragment  $\text{C}_2\text{N}_8\text{O}_2\text{H}_2$  in molecule II
