# Supplementary material for: Theoretical study on intra-molecule interactions in TKX-50
Source: Royal Society of Chemistry journal article supplement (doi:10.1039/d3cp03564f), 2023-01-01
Supplement: d3cp03564f2.pdf [file d3cp03564f2.pdf]

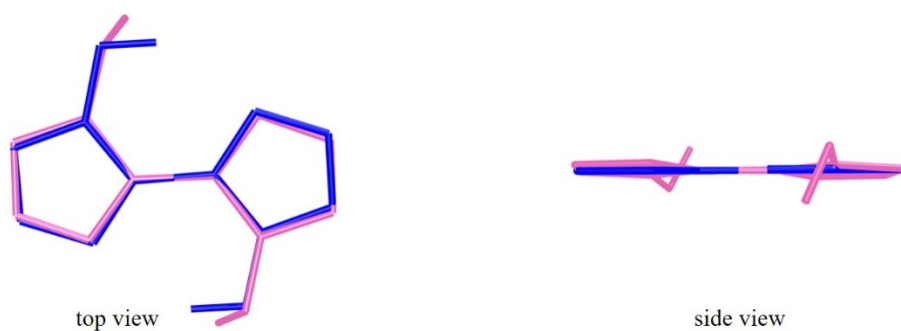

S2: optimized structure of isolate  $\text{HOC}_2\text{N}_8\text{OH}$  in blue and mauve fragment  $\text{C}_2\text{N}_8\text{O}_2\text{H}_2$  in molecule II . Total root mean square displacement/deviation (RMSD): 0.3488
